# Supplementary material for: Multifunctional Oxidized Dextran–Metformin as a Tissue‐Adhesive Hydrogel to Prevent Postoperative Peritoneal Adhesions in Patients with Metabolic Syndrome
Source: PubMed Central journal article supplement (PMC10667813; doi:10.1002/advs.202303767), 2023-10-16
Supplement: ADVS-10-2303767-s001.pdf [file ADVS-10-2303767-s001.pdf]

## Supporting Information

for *Adv. Sci.*, DOI 10.1002/advs.202303767

Multifunctional Oxidized Dextran–Metformin as a Tissue-Adhesive Hydrogel to Prevent Postoperative Peritoneal Adhesions in Patients with Metabolic Syndrome

*Xi Liu, Xianwen Song, Zequn Zhang, Shutong Yang, Liang Li, Changwei Lin, Miao Chen, Chuntai Liu, Xiaorong Li, Yi Zhang\* and Gui Hu\**

Table S1. Scoring system of mouse ischemic button model

| Score | Description                                                                                                                                                                                                                   |
|-------|-------------------------------------------------------------------------------------------------------------------------------------------------------------------------------------------------------------------------------|
| 0     | No visible adhesion to the ischemic button, with limited mesothelial thickening on the button.                                                                                                                                |
| 1     | A string adhesion to the ischemic button.                                                                                                                                                                                     |
| 2     | Direct attachment of one area of an organ to the ischemic button, the adhesion contact itself was light and usually involved contact between the peritoneum and an abdominal organ.                                           |
| 3     | Direct attachment of two non-continuous areas of one organ or two areas of two organs to the ischemic button, usually between the peritoneum and two abdominal organs or two distinct, noncontinuous areas of a single organ. |
| 4     | Direct attachment of three or more non-continuous areas to the ischemic button, usually between the peritoneum and three abdominal organs, or multiple separate areas of one or two organs.                                   |
| 5     | Full compaction/encapsulation of the abdominal organs, most organs were adhered to the peritoneum as well as to each other as a single, rigid mass.                                                                           |

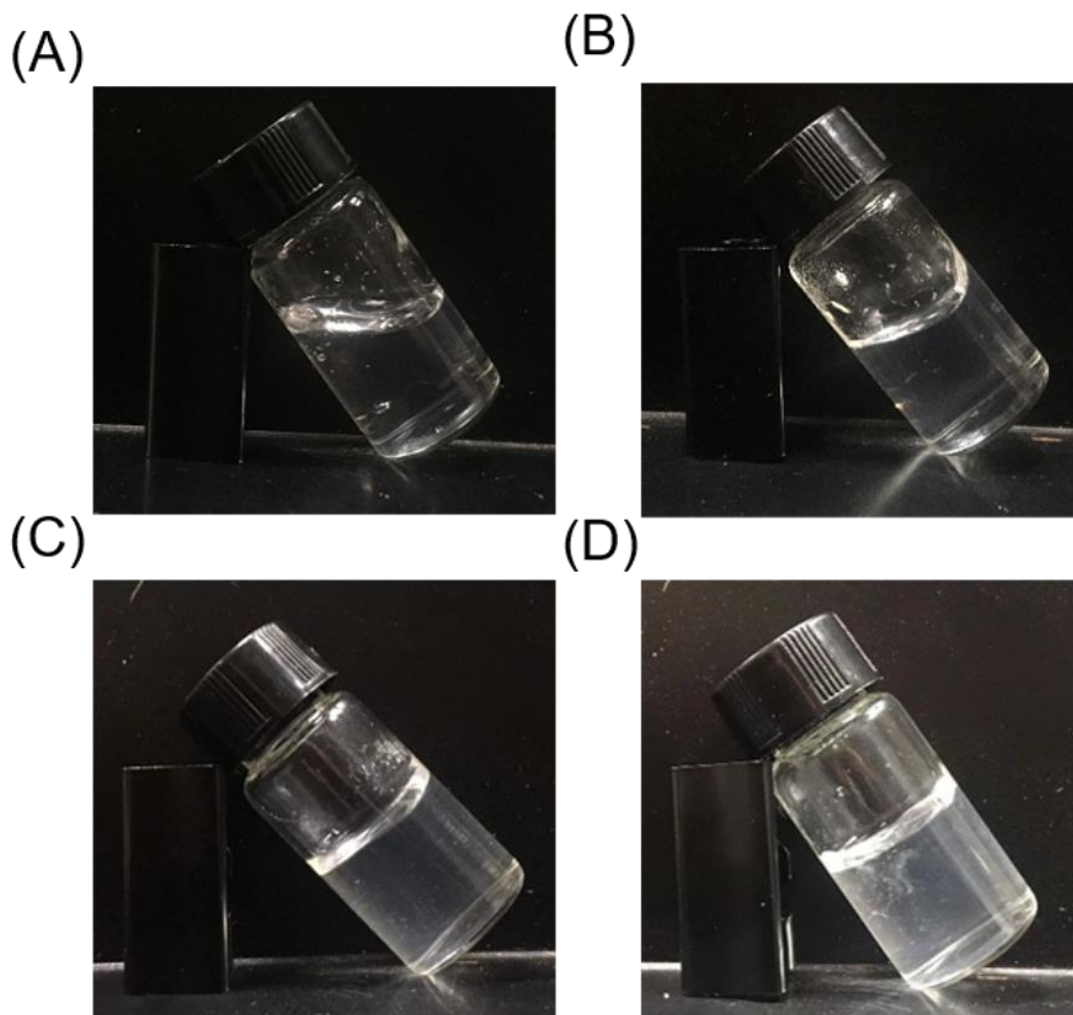

**Figure S1.** Pictures of ODE-ME in aqueous solution at concentrations of (A) 5 wt%, (B) 10 wt%, (C) 15 wt%, and (D) 20 wt%.

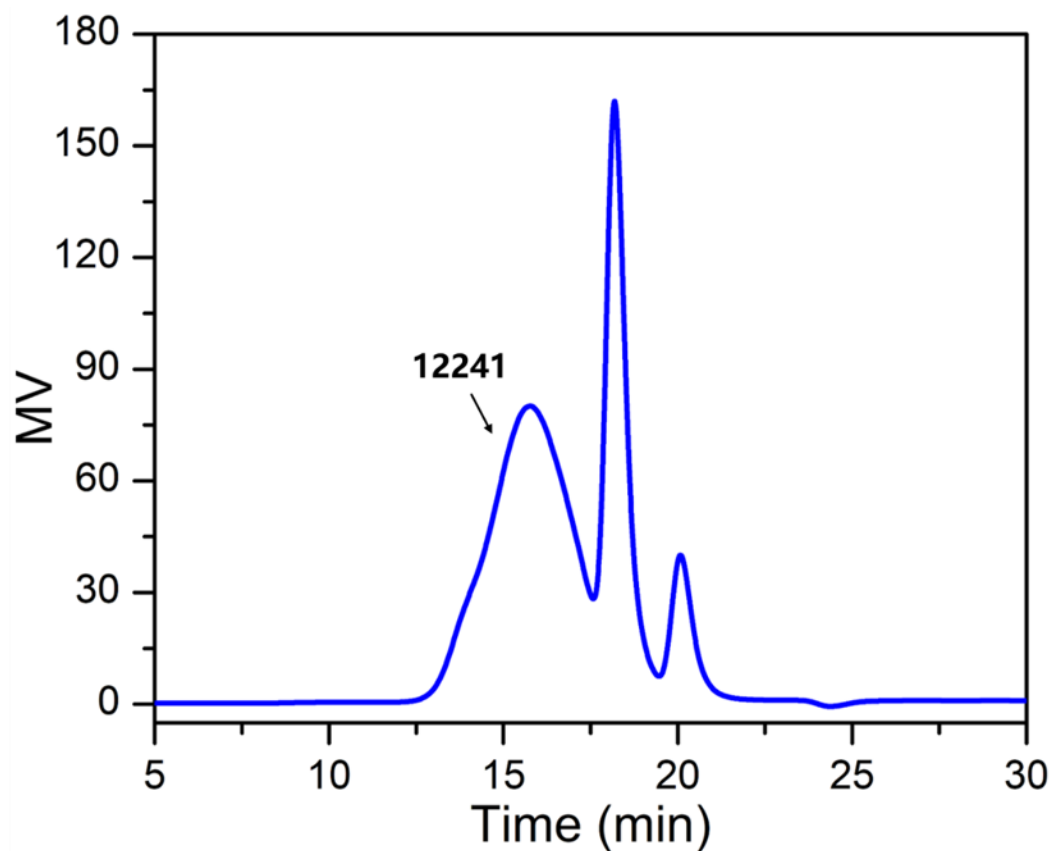

**Broad Unknown Relative Peak Table**

|   | Distribution Name | Mn (Daltons) | Mw (Daltons) | MP (Daltons) | Mz (Daltons) | Mz+1 (Daltons) | Polydispersity | Mz/Mw    | Mz+1/Mw  |
|---|-------------------|--------------|--------------|--------------|--------------|----------------|----------------|----------|----------|
| 1 |                   | 9757         | 21133        | 12241        | 44466        | 70071          | 2.165924       | 2.104121 | 3.315759 |

**Figure S2. Gel Permeation Chromatography (GPC) chromatogram of ODE-ME hydrogel.**

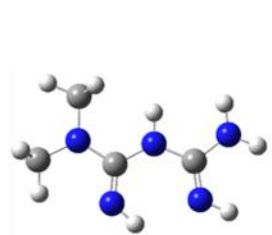

Metformin (**ME**)

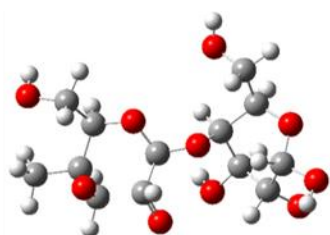

Oxidized dextran (**ODE**)

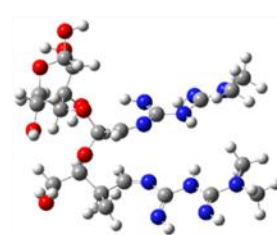

**ODE-ME** monomer

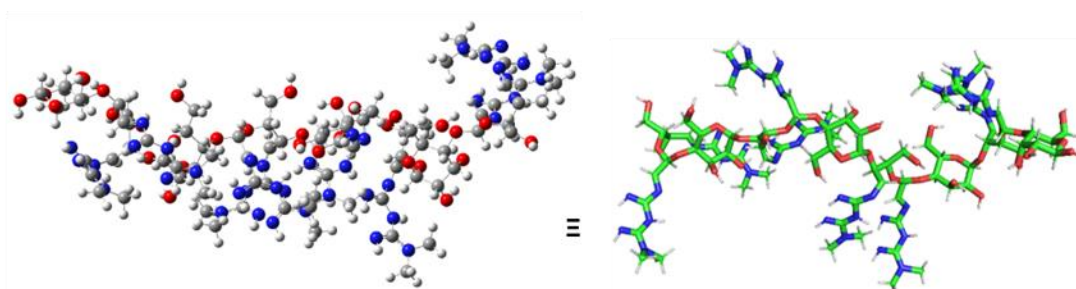

**ODE-ME** (n=7)

**Figure S3.** Molecular structure of ODE-ME molecular fragment.

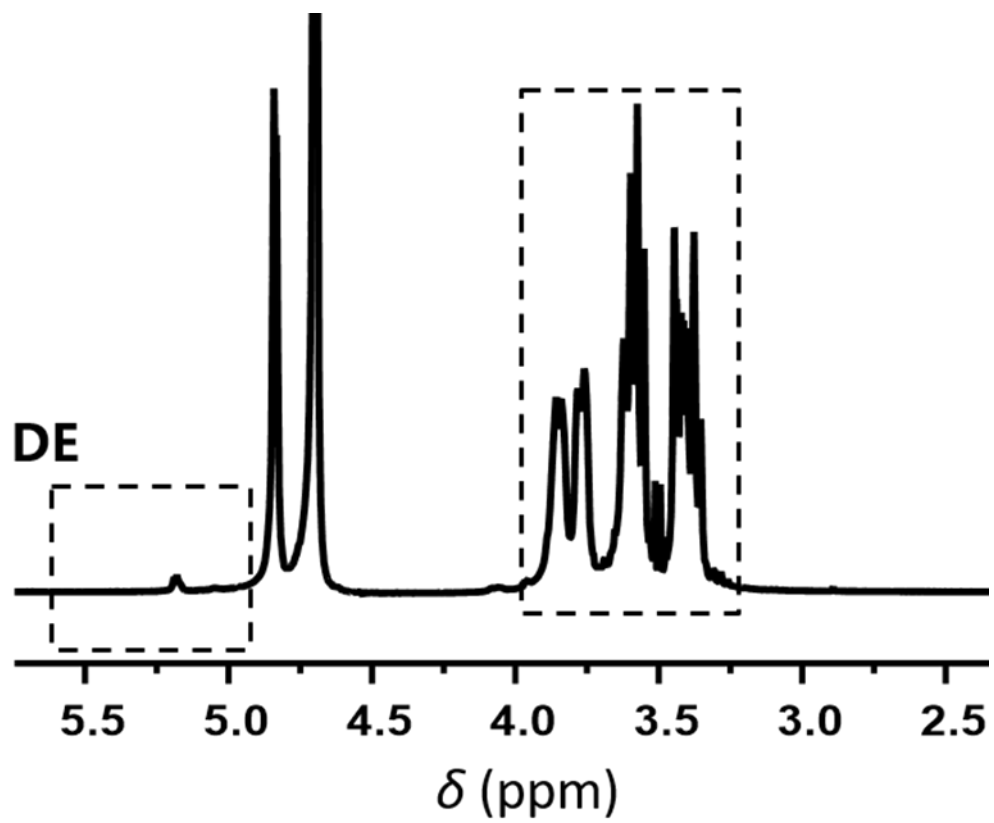

**Figure S4.** <sup>1</sup>H NMR spectra of the DE molecular.

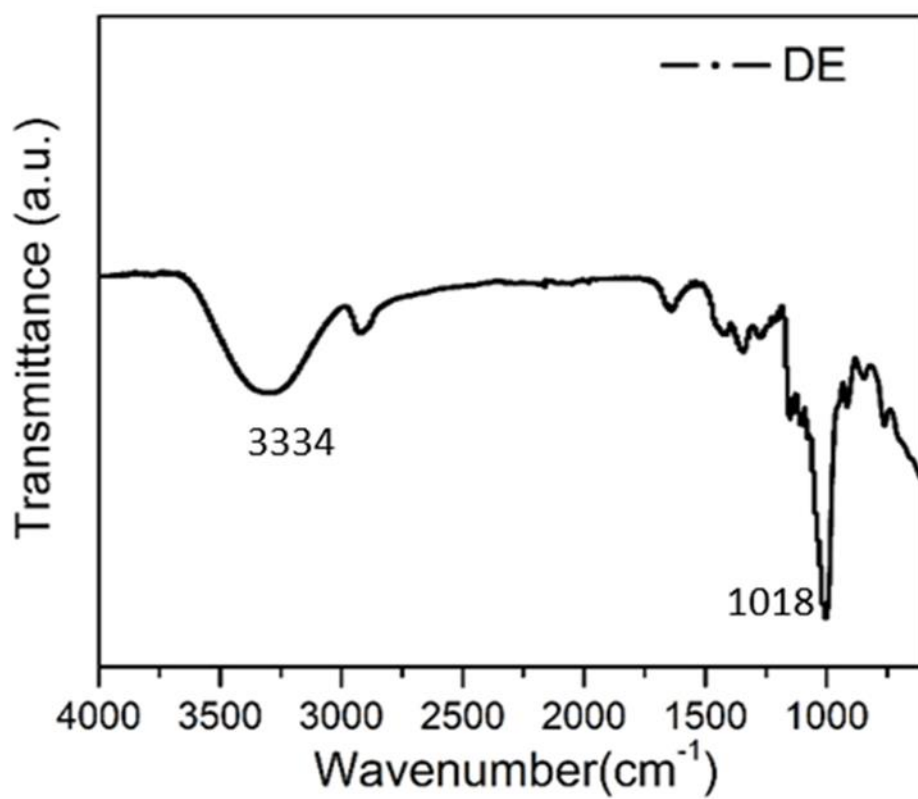

**Figure S5.** FT-IR spectra of the DE molecular.

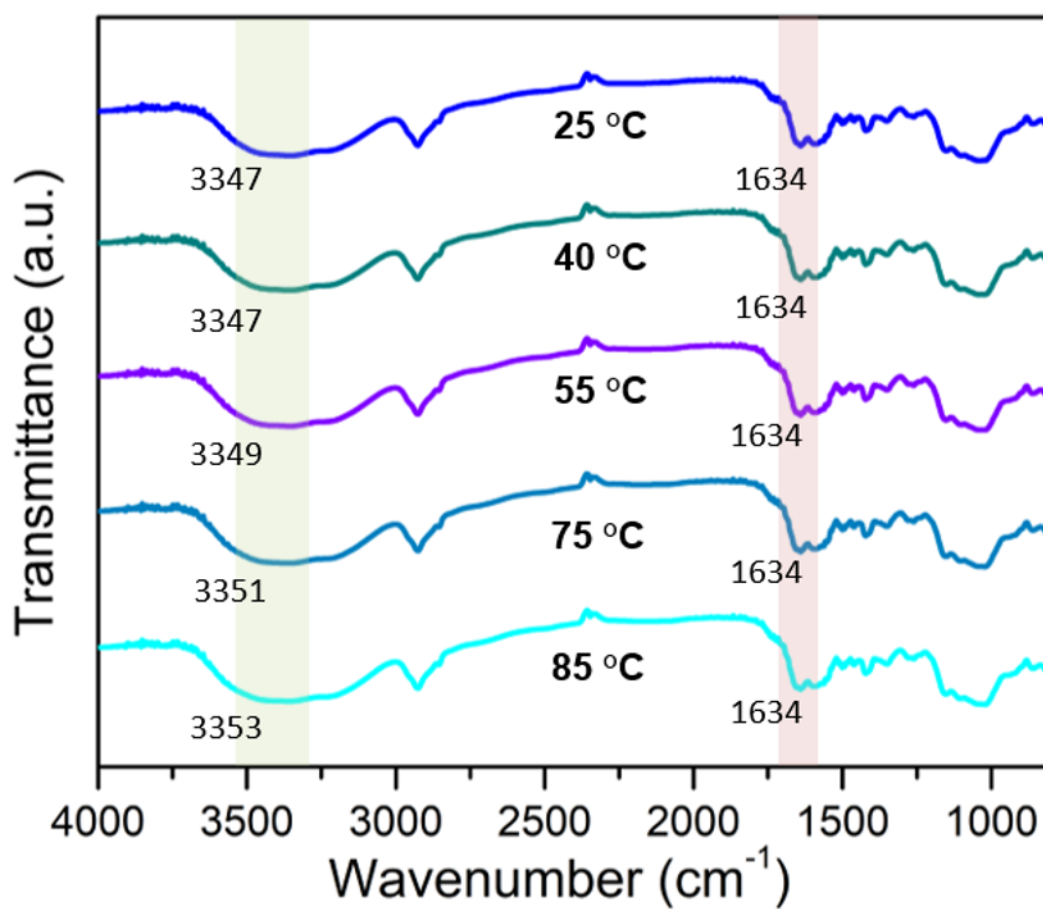

**Figure S6.** Variable-temperature FTIR spectroscopy of ODE-DE samples.



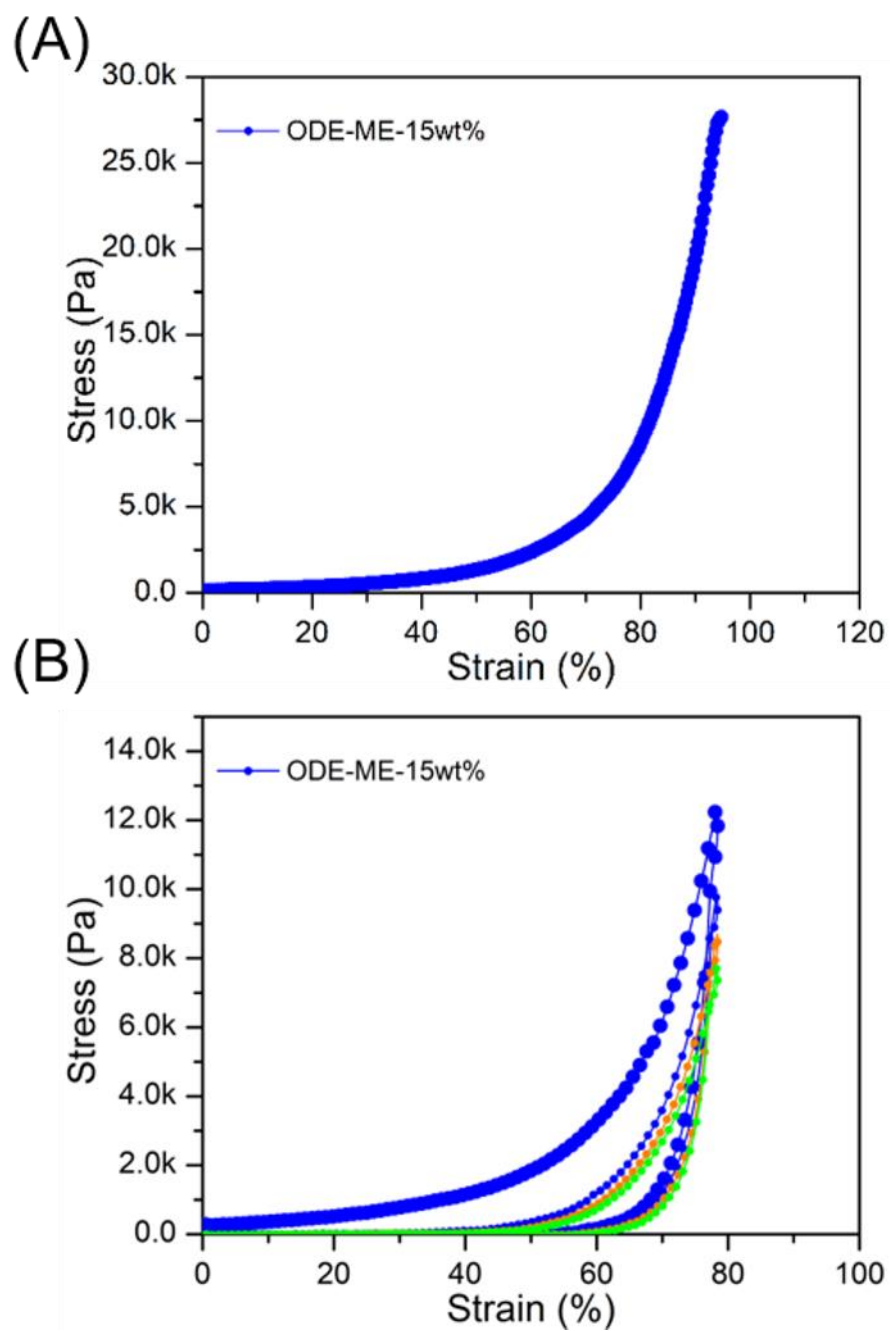

**Figure S7.** (A) Stress-strain curves and (B) continuous loading-unloading tests of ODE-DE -15wt% hydrogels in compression.

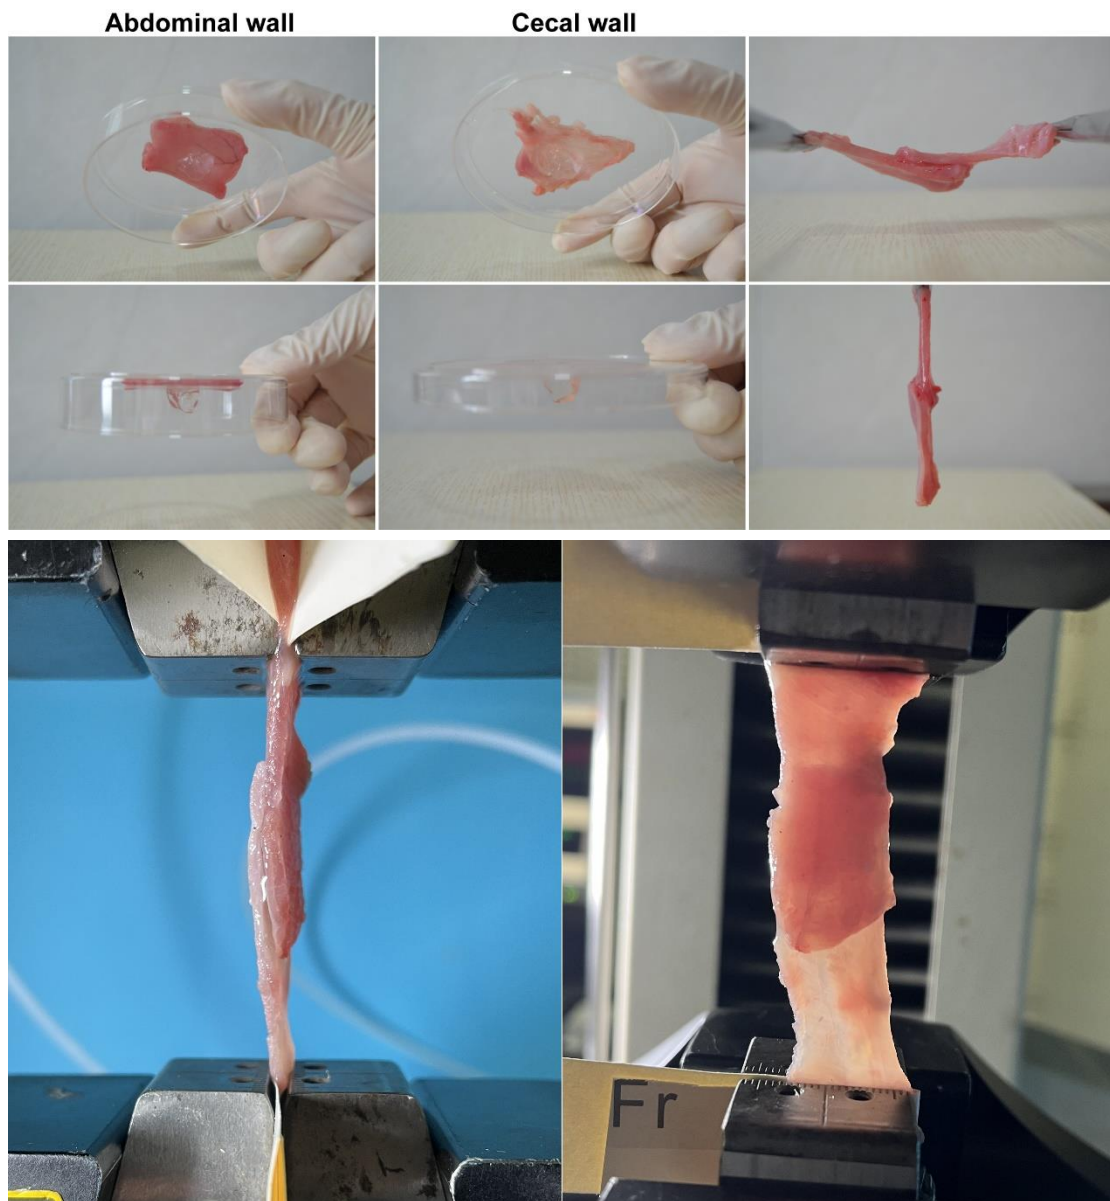

**Figure S8.** Tissue-adhesive and lap shear test of ODE-ME hydrogels.

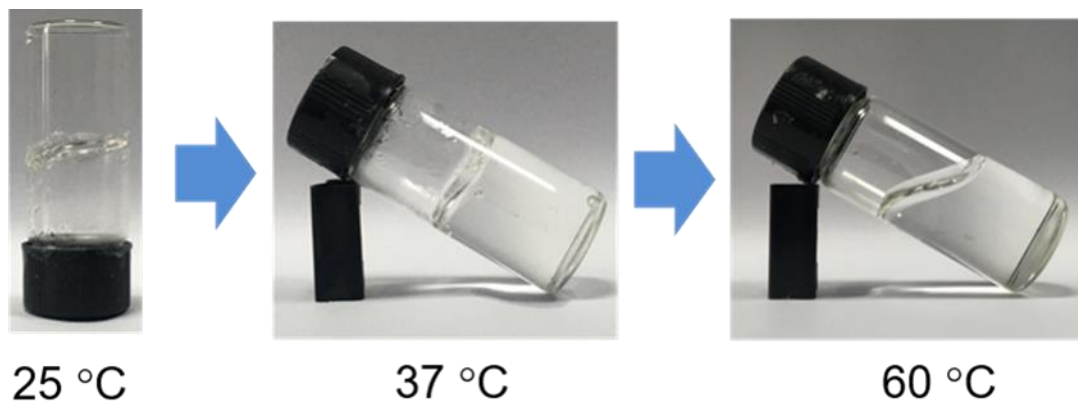

**Figure S9.** ODE-ME hydrogels at different temperatures.

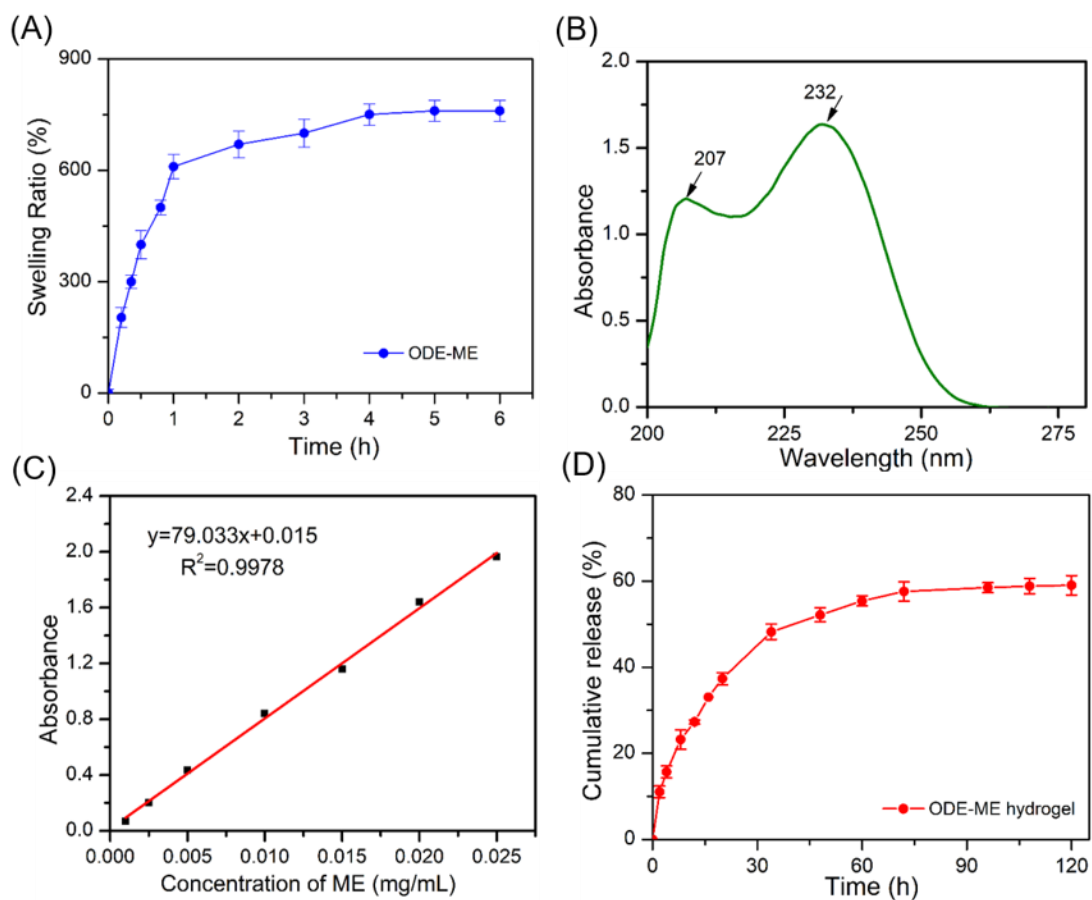

**Figure S10.** (A) Swelling test of hydrogels. (B) UV-absorption pattern of metformin. (C) Standard curve of ME, as constructed using a series of known ME concentrations in PBS solution. (D) Releasing behavior of the ODE-ME hydrogel.

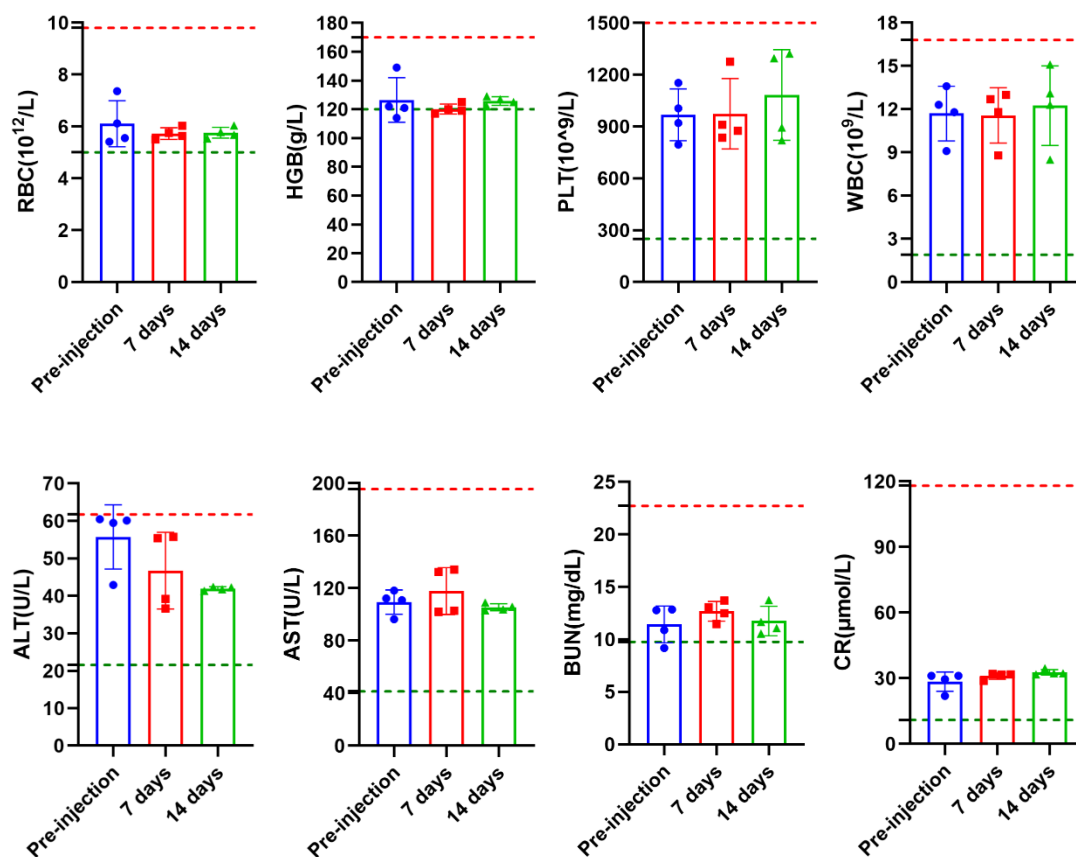

**Figure S11.** Blood biochemical examination and routine examination results of rats after intraperitoneal injection of ODE-ME-15wt% hydrogels (n = 4). The red dotted lines represent the upper limit of normal physiological values. The green dotted lines represent the lower limit of normal physiological values. WBC: White Blood Cells, PLT: Platelets, RBC: Red Blood Cells, HGB: Hemoglobin, ALT: Alanine aminotransferase, AST: Aspartate aminotransferase, BUN: Blood Urea Nitrogen, CR: Creatinine.

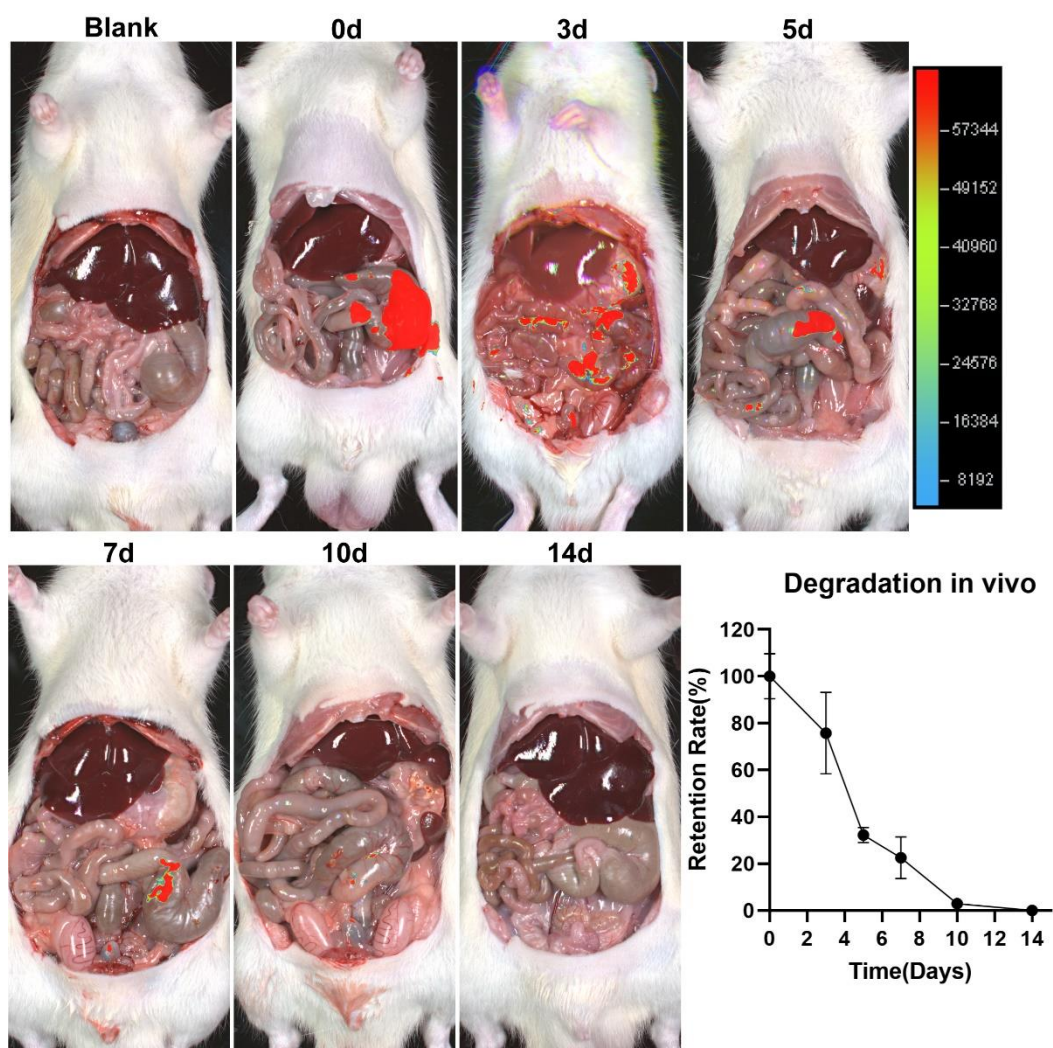

**Figure S12.** Representative images of *in vivo* imaging at different time points after FITC-labeled ODE-ME-15wt% hydrogel was injected into the abdominal cavity and Quantitative statistical analysis of the degradation rate (n = 3).

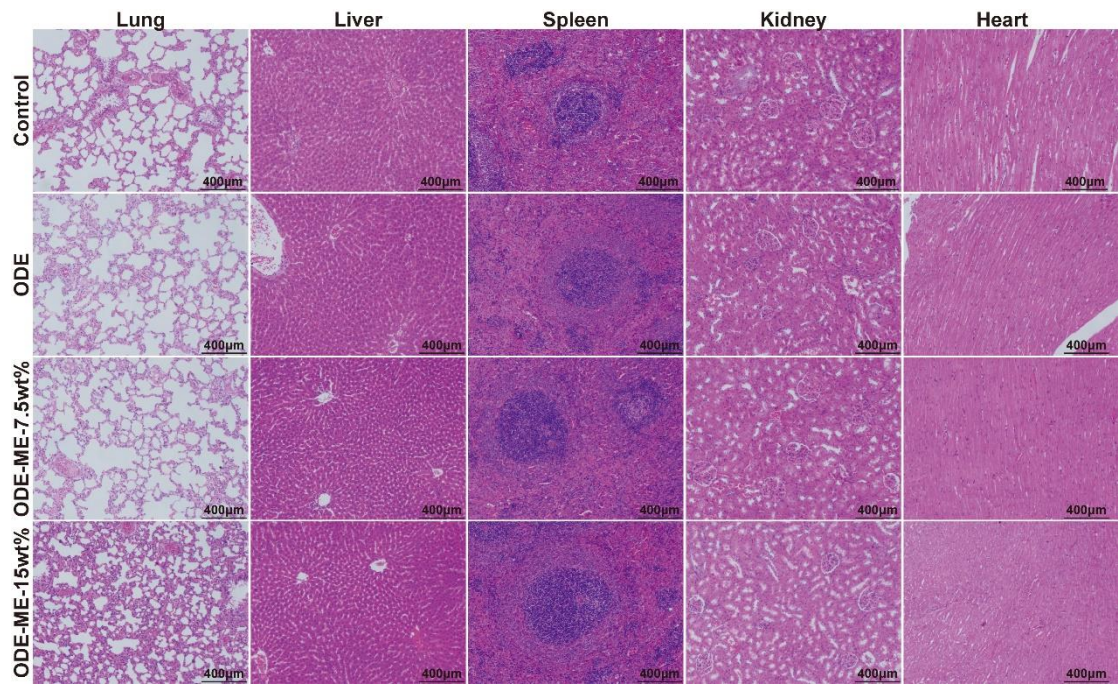

**Figure S13.** H&E staining results to evaluate the effects of ODE-ME hydrogels on heart, liver, spleen, lung, and kidney.

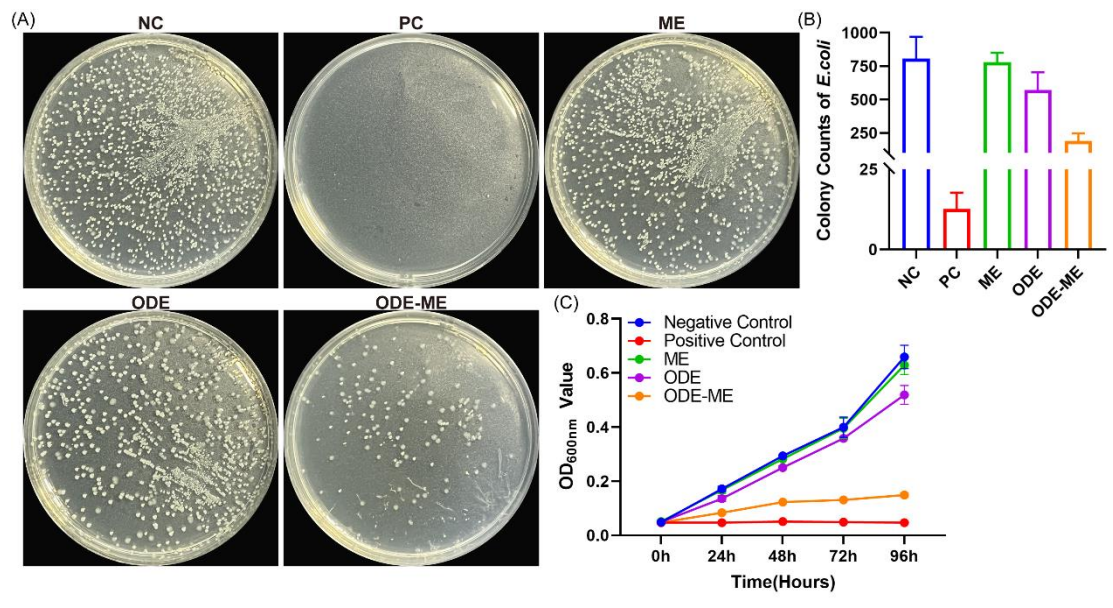

**Figure S14.** (A) Representative display pictures and (B) quantitative statistical data of ODE-ME hydrogels anti-*E.coli* test (n = 3). (C) Time-dependent antibacterial test toward *E.coli* (n = 3).



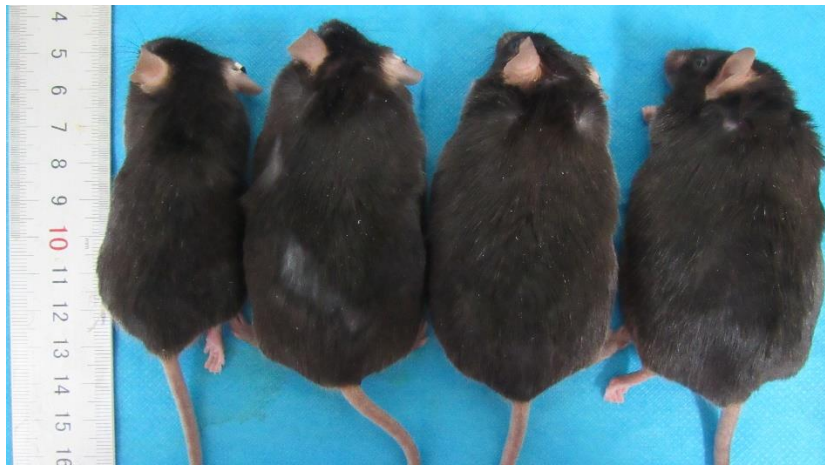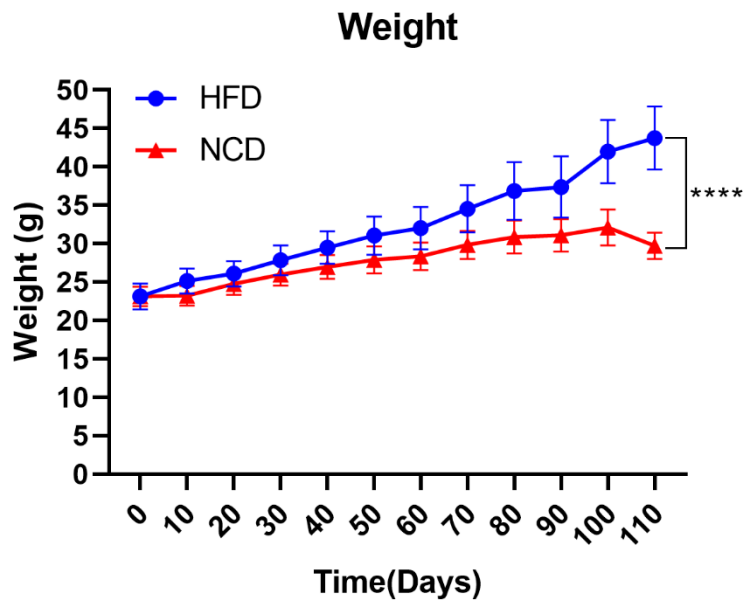

**Figure S15.** General photographs of mice after NCD and HFD feeding and Body weight changes.

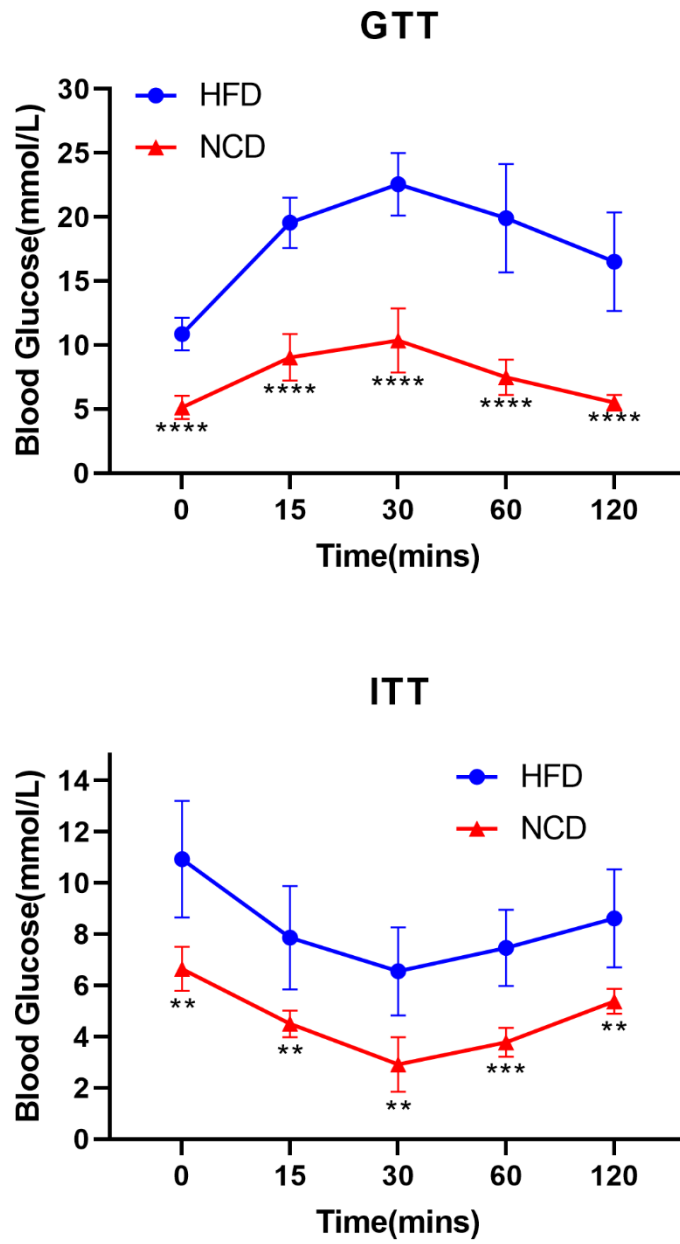

**Figure S16.** Glucose tolerance tests (GTTs) and insulin tolerance tests (ITTs) results of mice fed with NCD and HFD (n = 6).

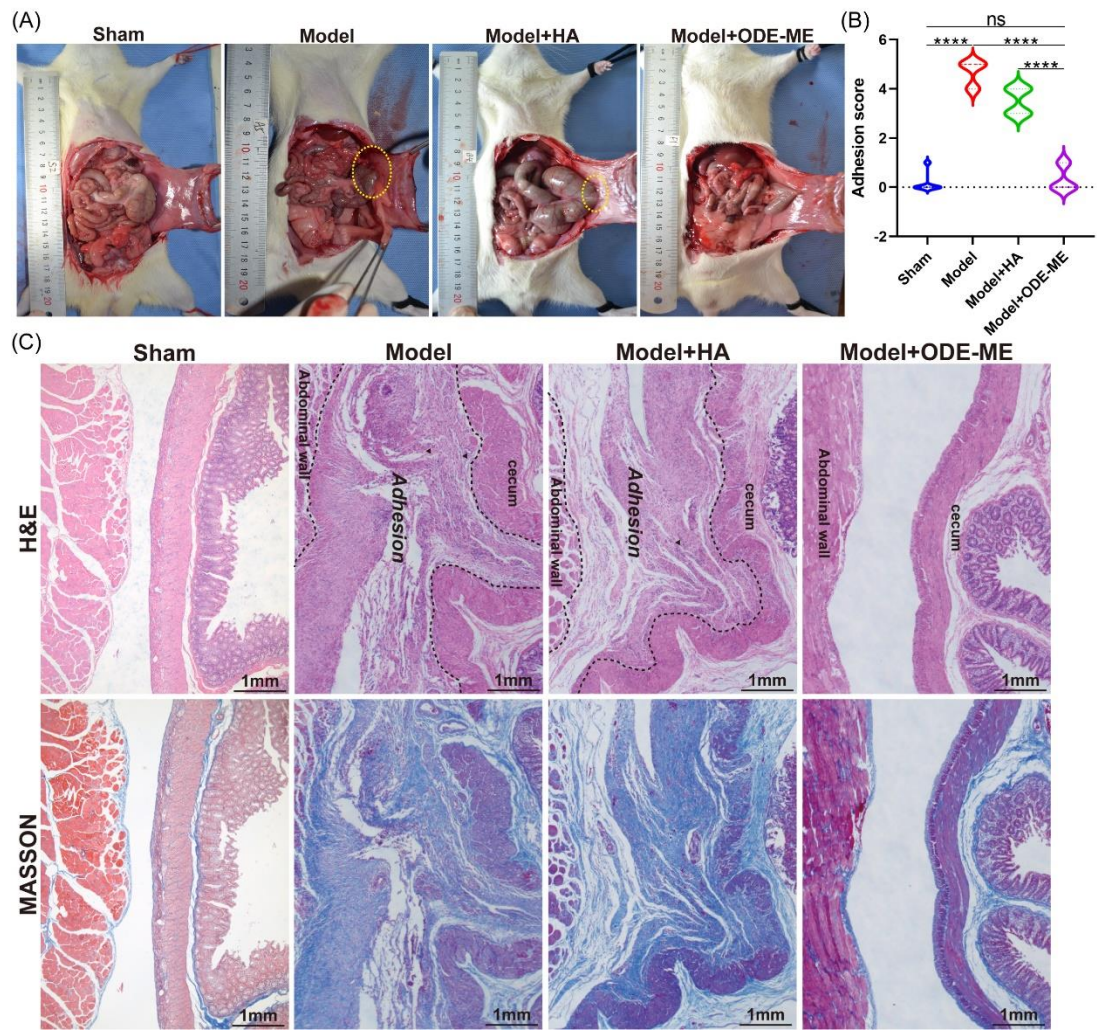

**Figure S17.** Prevention of cecum abrasion-sidewall defect by the ODE-ME hydrogel in the adhesion model. (A) Representative photographs of postoperative peritoneal adhesions on day 7 and (B) adhesion scores of different groups (n = 6). (C) Results of representative H&E staining and Masson staining of each group on day 7 after the first surgery.

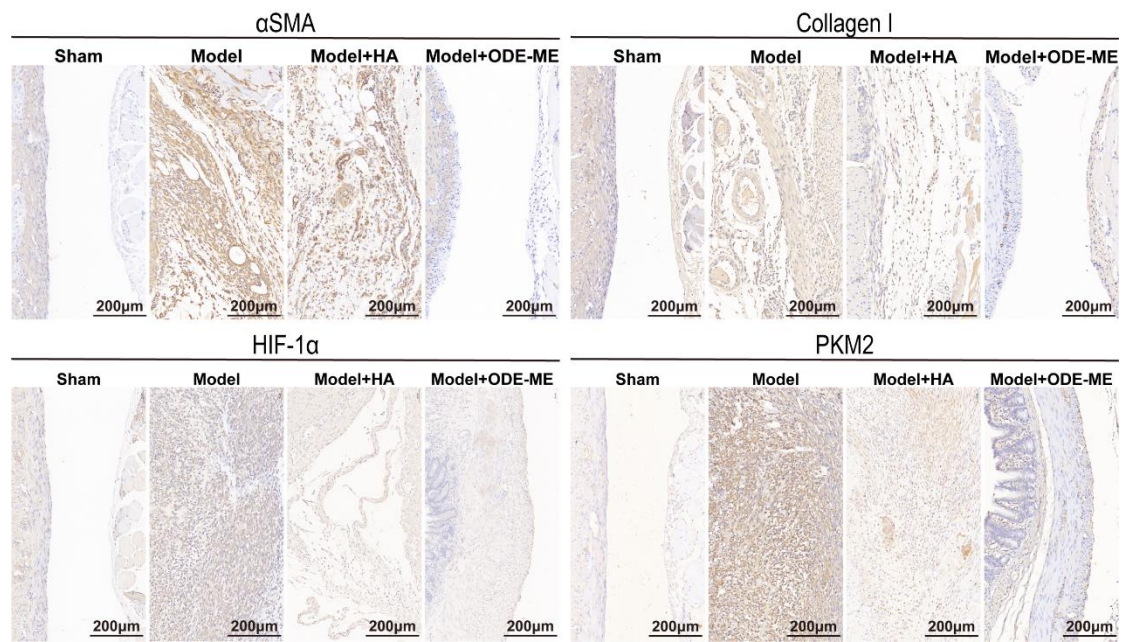

**Figure S18.** Representative images of IHC staining of  $\alpha$ SMA, Collagen I, HIF1 $\alpha$  and PKM2 on day 7 after the first surgery.
